# Supplementary material
Source: HighWire-hosted journal article supplement (https://www.annfammed.org/highwire/filestream/7942/field_highwire_adjunct_files/0/Jimbo_Supp_App.pdf)
Supplement: Jimbo_Supp_App.pdf [file Jimbo_Supp_App.pdf]

**Online Supplementary Material**

Jimbo M, Myers RE, Meyer B, et al. Reasons patients with a positive fecal occult blood test result do not undergo complete diagnostic evaluation. *Ann Fam Med.* 2009;7(1):11-16.

<http://www.annfammed.org/cgi/content/full/7/1/11/DC1>

**Supplemental Appendix. Sample Internal Chart Audit Form**

Dear Dr. «Doctors»:

Screening program records indicate that «FNAME» «LNAME» («MEMBRID»), a patient in your office, had a positive fecal occult blood test (FOBT) result on «FOBTDT». As a participant in "The CDE Study," an NCI-funded study on colorectal cancer screening and follow-up, your office is asked to record the information requested below for the patient.

Please fax the completed form to (XXX) XXX-XXX, a secure fax line, within two weeks of receipt. Alternatively, send a copy of the completed form by mail using the enclosed addressed, postage-paid envelope.

| «First_Name» «Last_Name»                                                                                                                                                                                                                                                                                                                                                                    |                                                                                                                                     |                                                                                                                                     |                                                                                                                                                                                                                                                                                                                                                                                                                                                                                                     |
|---------------------------------------------------------------------------------------------------------------------------------------------------------------------------------------------------------------------------------------------------------------------------------------------------------------------------------------------------------------------------------------------|-------------------------------------------------------------------------------------------------------------------------------------|-------------------------------------------------------------------------------------------------------------------------------------|-----------------------------------------------------------------------------------------------------------------------------------------------------------------------------------------------------------------------------------------------------------------------------------------------------------------------------------------------------------------------------------------------------------------------------------------------------------------------------------------------------|
| FOBT_Date                                                                                                                                                                                                                                                                                                                                                                                   |                                                                                                                                     |                                                                                                                                     |                                                                                                                                                                                                                                                                                                                                                                                                                                                                                                     |
| <b>FOBT+ FOLLOW-UP FORM</b>                                                                                                                                                                                                                                                                                                                                                                 |                                                                                                                                     |                                                                                                                                     |                                                                                                                                                                                                                                                                                                                                                                                                                                                                                                     |
| Flexible Sigmoidoscopy (FS)                                                                                                                                                                                                                                                                                                                                                                 | Barium Enema X-Ray (BE)                                                                                                             | Colonoscopy (CX)                                                                                                                    | Reason(s) why both FS and BE or CX not advised or not done                                                                                                                                                                                                                                                                                                                                                                                                                                          |
| <input type="radio"/> Not advised<br><input type="radio"/> Advised, but not done<br><input type="radio"/> FS done<br>Date: __/__/__                                                                                                                                                                                                                                                         | <input type="radio"/> Not advised<br><input type="radio"/> Advised, but not done<br><input type="radio"/> BE done<br>Date: __/__/__ | <input type="radio"/> Not advised<br><input type="radio"/> Advised, but not done<br><input type="radio"/> CX done<br>Date: __/__/__ | <input type="radio"/> Procedure(s) completed just prior to FOBT+ result date.<br><input type="radio"/> Patient not known to practice at time of FOBT+ result.<br><input type="radio"/> Patient left practice before procedure(s) could be done.<br><input type="radio"/> Patient medical condition contraindicated use of procedure.<br><input type="radio"/> Patient referred to specialist, but procedure(s) not done.<br><input type="radio"/> Patient deceased.<br><input type="radio"/> Other: |
| Diagnosis:                                                                                                                                                                                                                                                                                                                                                                                  |                                                                                                                                     |                                                                                                                                     |                                                                                                                                                                                                                                                                                                                                                                                                                                                                                                     |
| <input type="radio"/> Colon cancer <input type="radio"/> Diverticulitis <input type="radio"/> No pathology found<br><input type="radio"/> Rectal cancer <input type="radio"/> Peptic ulcer disease <input type="radio"/> Other<br><input type="radio"/> Polyp<br><input type="radio"/> Diverticulosis <input type="radio"/> Arteriovenous malformation<br><input type="radio"/> Hemorrhoids |                                                                                                                                     |                                                                                                                                     |                                                                                                                                                                                                                                                                                                                                                                                                                                                                                                     |
